# Supplementary material for: Role of Histone Tails in Structural Stability of the Nucleosome
Source: PubMed Central journal article supplement (PMC3240580; doi:10.1371/journal.pcbi.1002279), 2011-12-15
Supplement: pcbi.1002279.s001.pdf [file pcbi.1002279.s001.pdf]

DNA phosphorous atom B-factors were computed from the last 50 ns of the intact and tail-truncated nucleosome simulations (Fig. S1) [48,49]. Small B-factor differences between intact and tail-truncated nucleosome simulation are observed at specific nucleotide positions where the truncated histone tails contact the DNA in the intact nucleosome.
