# Supplementary material for: Role of Histone Tails in Structural Stability of the Nucleosome
Source: PubMed Central journal article supplement (PMC3240580; doi:10.1371/journal.pcbi.1002279), 2011-12-15

— Intact nucleosome simulation  
— Crystal structure

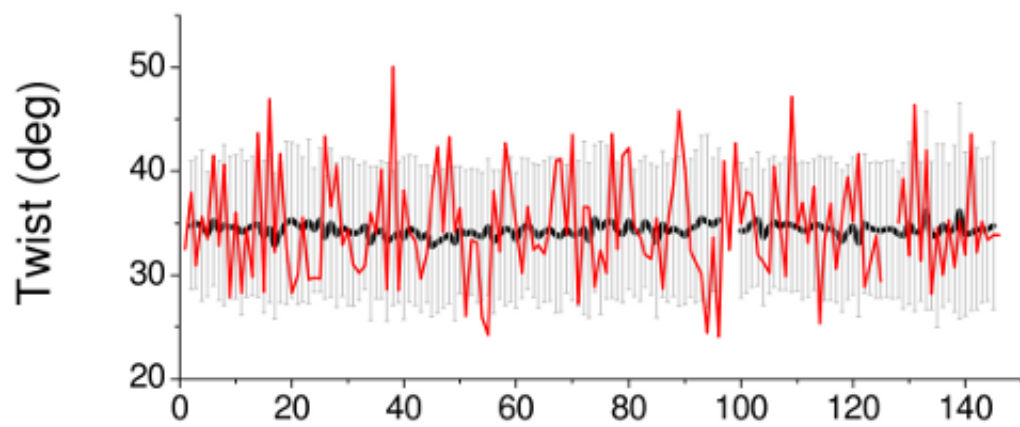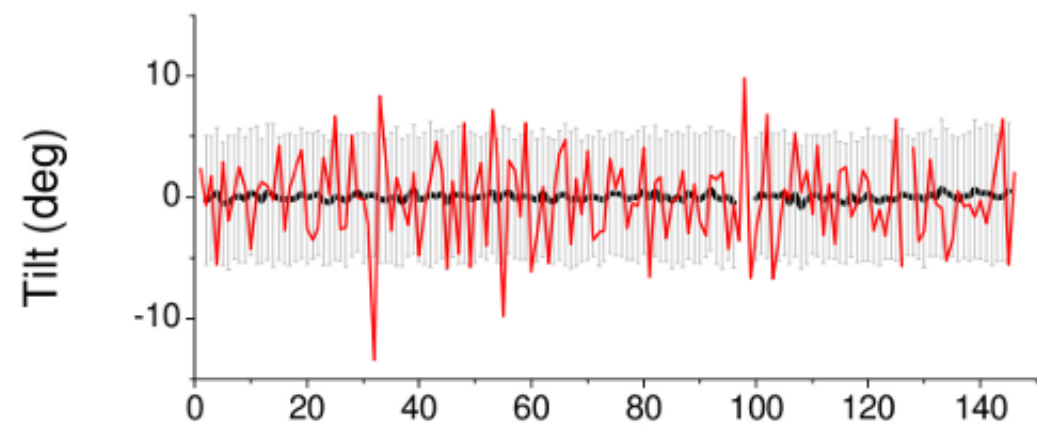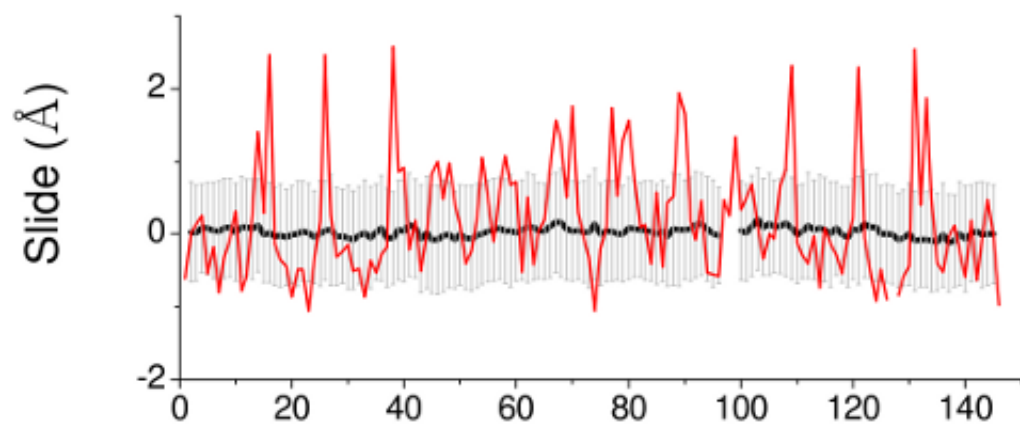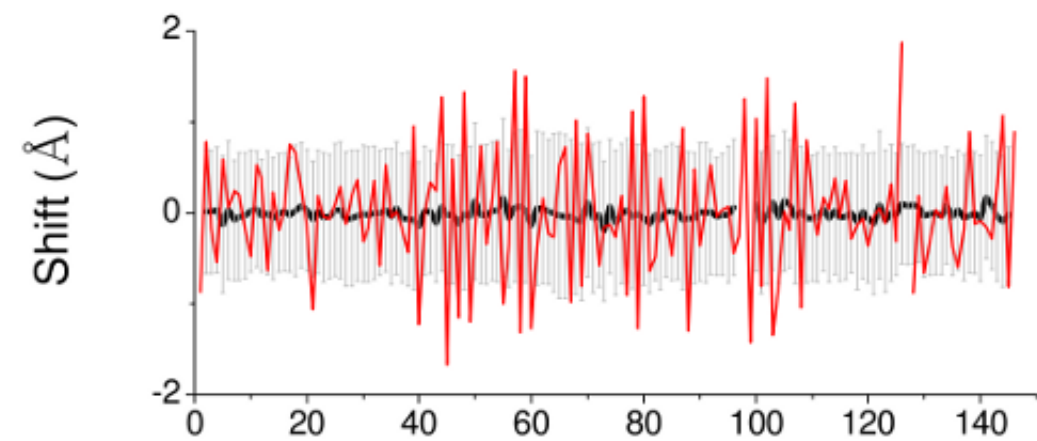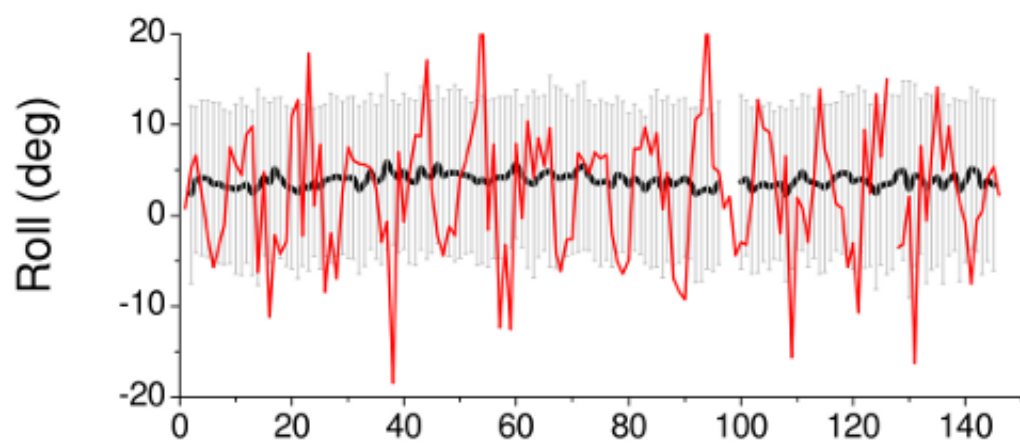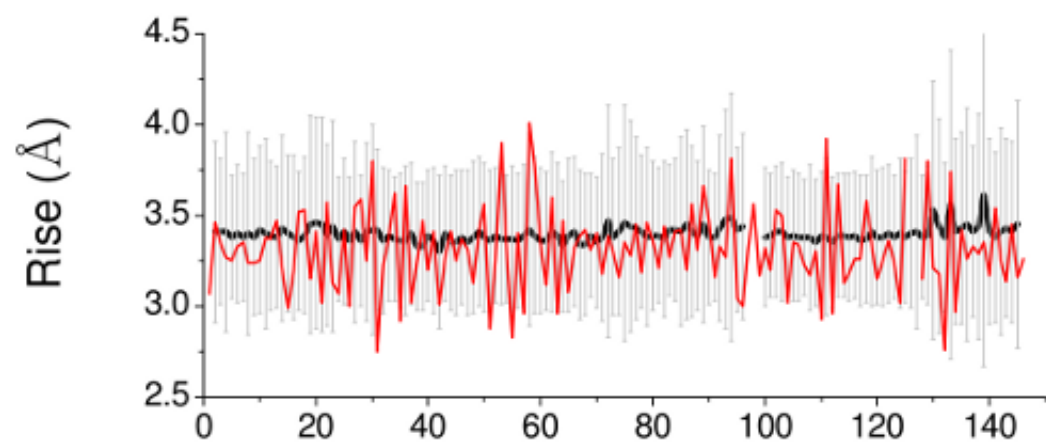

Supplement: pcbi.1002279.s004.pdf [file pcbi.1002279.s004.pdf]
