# Supplementary material for: Role of Histone Tails in Structural Stability of the Nucleosome
Source: PubMed Central journal article supplement (PMC3240580; doi:10.1371/journal.pcbi.1002279), 2011-12-15
Supplement: pcbi.1002279.s007.pdf [file pcbi.1002279.s007.pdf]

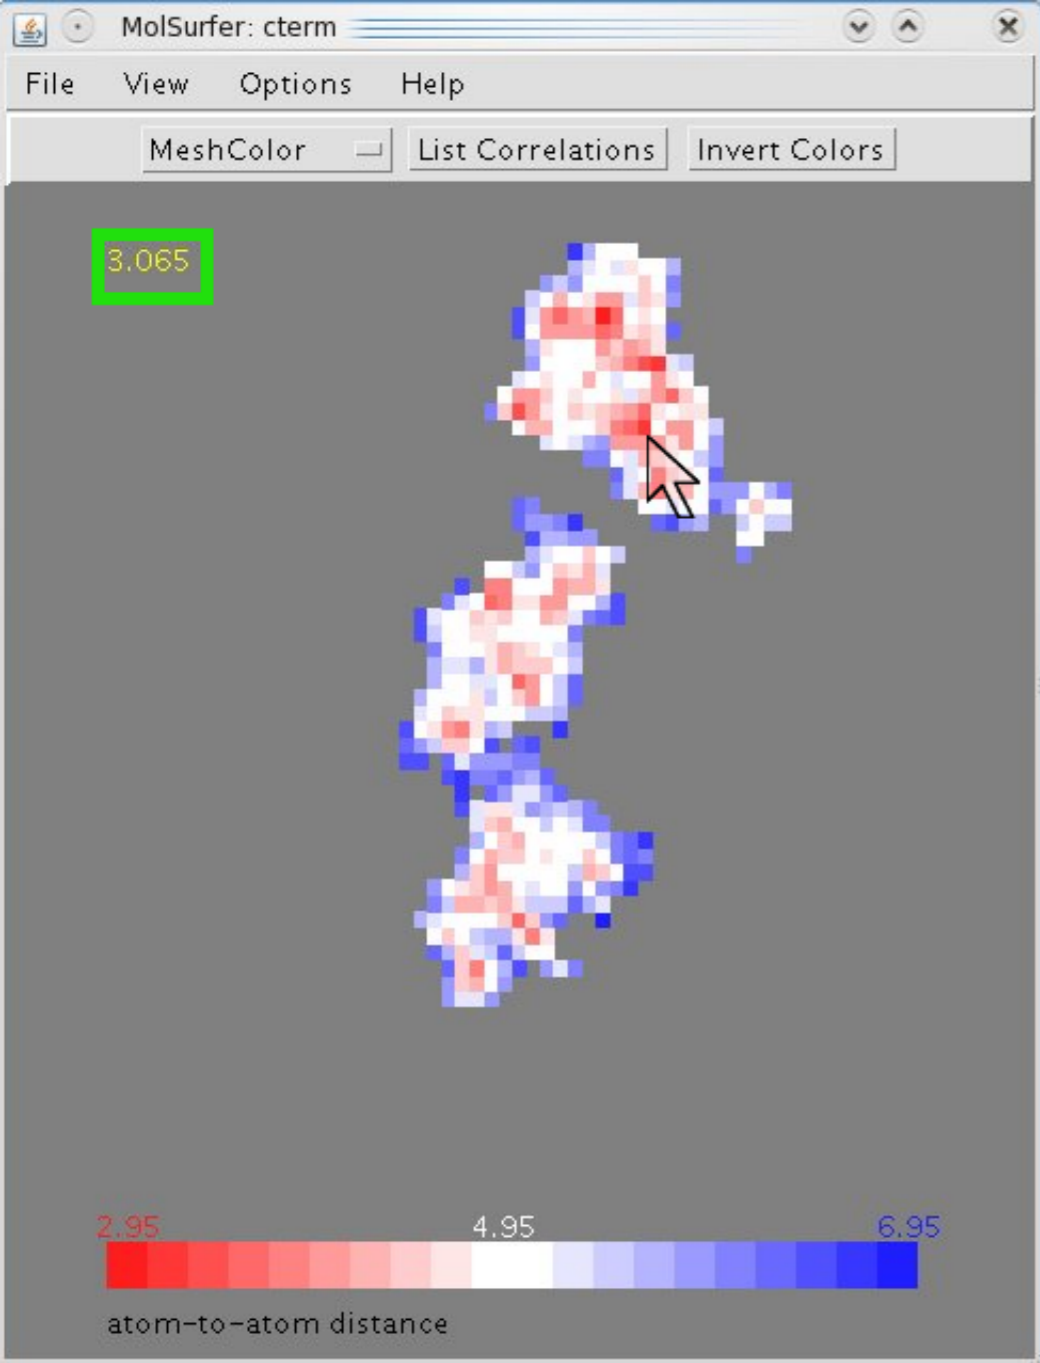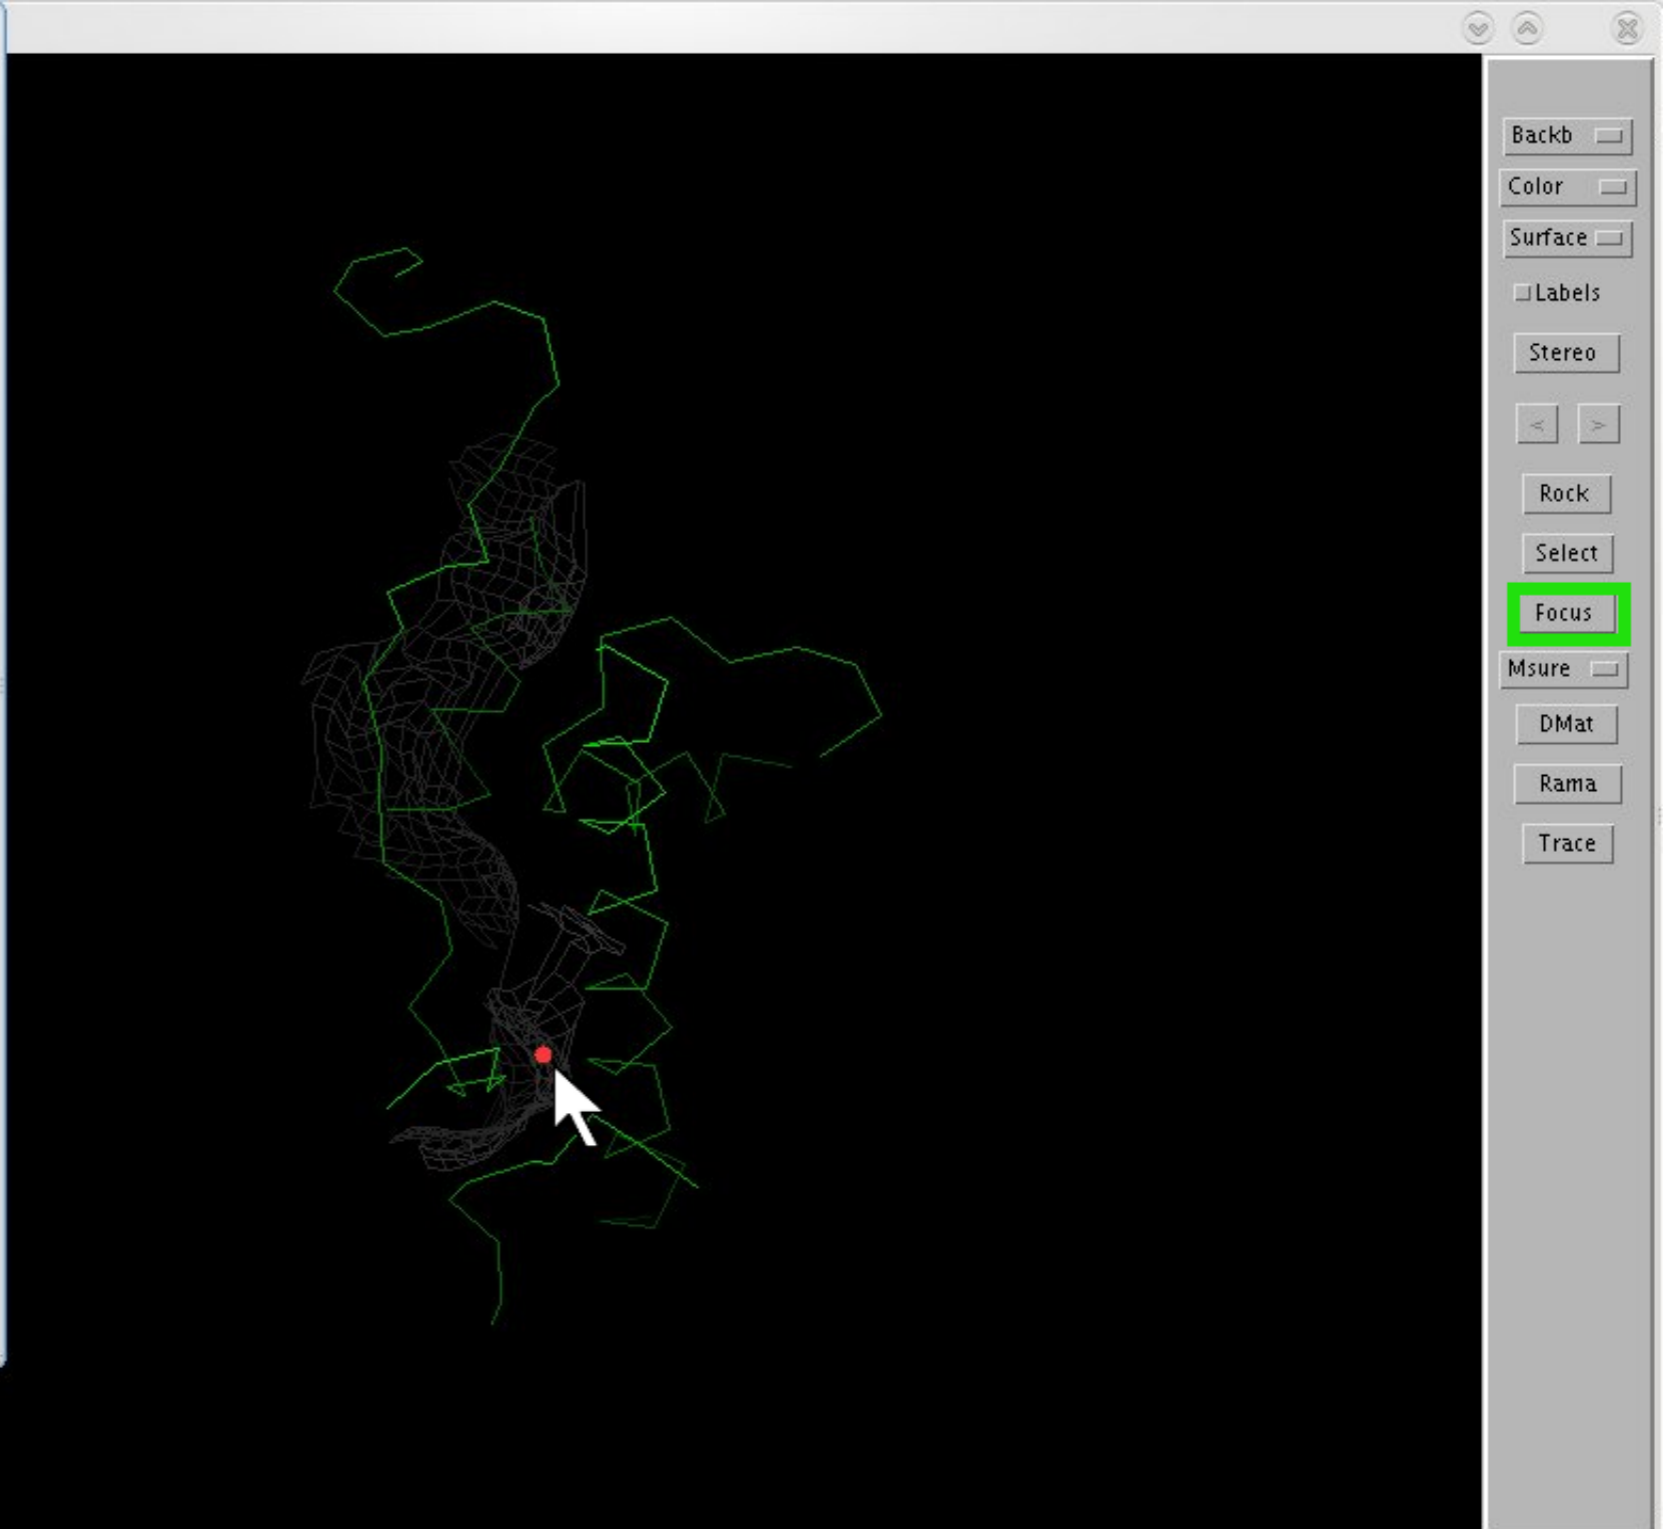

nucleo : java

WebMol cterm.pdb Open Print C'n'P ResetSlab Center Control Info Help ? Quit
