# Supplementary material for: Role of Histone Tails in Structural Stability of the Nucleosome
Source: PubMed Central journal article supplement (PMC3240580; doi:10.1371/journal.pcbi.1002279), 2011-12-15
Supplement: pcbi.1002279.s008.pdf [file pcbi.1002279.s008.pdf]

Supplementary Table 1: Comparison between 20 ns [Ref. 19] and 100 ns nucleosome trajectories

|                                                                           |        | 20 ns   | 100 ns                                                                                                                     |
|---------------------------------------------------------------------------|--------|---------|----------------------------------------------------------------------------------------------------------------------------|
| Intact nucleosome simulation                                              |        |         |                                                                                                                            |
| Backbone RMSD                                                             | H3(1)  | ~ 1.2 Å | 1.31 ± 0.13 Å                                                                                                              |
|                                                                           | H3(2)  |         | 1.32 ± 0.13 Å                                                                                                              |
|                                                                           | H4(1)  | ~ 0.8 Å | 1.32 ± 0.16 Å                                                                                                              |
|                                                                           | H4(2)  |         | 1.15 ± 0.19 Å                                                                                                              |
|                                                                           | H2A(1) | ~ 2.1 Å | 1.41 ± 0.16 Å                                                                                                              |
|                                                                           | H2A(2) |         | 1.50 ± 0.19 Å                                                                                                              |
|                                                                           | H2B(1) | ~ 0.9 Å | 1.56 ± 0.24 Å                                                                                                              |
|                                                                           | H2B(2) |         | 1.37 ± 0.17 Å                                                                                                              |
| Conservation of protein secondary structure                               |        | x       | α-helics formation in H3 and H2B tail during simulation                                                                    |
| DNA RMSD                                                                  |        | ~ 2.5 Å | 3.2 ± 0.17 Å                                                                                                               |
| DNA backbone conformation                                                 |        | B1 type | B1 type                                                                                                                    |
| Tail-truncated simulations                                                |        |         |                                                                                                                            |
| Structural changes in the H2A2α3 domain                                   |        | x       | Structural changes in the sidechain hydrogen bonding Arg81 and Arg88 are observed in H3 and H2A tail-truncated simulations |
| Change of interaction between the H2A docking domain and contact residues |        | x       | Interaction changes observed in H3 and H2A tail-truncated simulations.                                                     |
