# Supplementary material for: Role of Histone Tails in Structural Stability of the Nucleosome
Source: PLoS Comput Biol. 2011 Dec 15;7(12):e1002279. doi: 10.1371/journal.pcbi.1002279 (PMC3240580; doi:10.1371/journal.pcbi.1002279)
Supplement: Table S2 — Interaction change in histone monomers with respect to key findings. (PDF) [file pcbi.1002279.s009.pdf]

*Supplementary Table 2: Interaction change in histone monomers with respect to key findings*

| <b>Simulation type</b>        | <b>Simulation number</b> | <b>Observed structural change in histone</b>                               | <b>Monomer 1</b> | <b>Monomer 2</b> |
|-------------------------------|--------------------------|----------------------------------------------------------------------------|------------------|------------------|
| Intact nucleosome             | 1                        | Formation of $\alpha$ -helix in H3 tail                                    | √                | x                |
|                               |                          |                                                                            |                  |                  |
| H3 tail truncated nucleosome  | 1                        | Change of interaction in Arg81 of H2A                                      | x                | √                |
|                               | 2                        |                                                                            | x                | √                |
|                               | 3                        |                                                                            | x                | x                |
|                               |                          |                                                                            |                  |                  |
|                               | 1                        | Change of interaction of Arg88 of H2A                                      | x                | √                |
|                               | 2                        |                                                                            | x                | √                |
|                               | 3                        |                                                                            | x                | √                |
|                               |                          |                                                                            |                  |                  |
|                               | 1                        | Destabilization of H2A docking domain contacts with closely lying residues | x                | √                |
|                               | 2                        |                                                                            | x                | √                |
|                               | 3                        |                                                                            | x                | √                |
|                               |                          |                                                                            |                  |                  |
| H2A tail truncated nucleosome | 1                        | Change of interaction of Arg88 of H2A                                      | √                | √                |
|                               | 2                        |                                                                            | √                | √                |
|                               |                          |                                                                            |                  |                  |
|                               | 1                        | Destabilization of H2A docking domain contacts with closely lying residues | √                | √                |
|                               | 2                        |                                                                            | √                | x                |
|                               |                          |                                                                            |                  |                  |
